# Supplementary material for: Chronic circadian disruption modulates breast cancer stemness and immune microenvironment to drive metastasis in mice
Source: Nat Commun. 2020 Jun 24;11:3193. doi: 10.1038/s41467-020-16890-6 (PMC7314789; doi:10.1038/s41467-020-16890-6)
Supplement: Supplementary file 1 — Supplementary Information [file 41467_2020_16890_MOESM1_ESM.pdf]

# Chronic circadian disruption modulates breast cancer stemness and immune microenvironment to drive metastasis in mice

Hadadi et al.

Supplementary Information includes four tables and ten figures.

| Locomotor activity |                                |                       |                                    |                       |
|--------------------|--------------------------------|-----------------------|------------------------------------|-----------------------|
|                    | LD (D10-D20 post implantation) |                       | LD (D32-D46 post implantation)     |                       |
|                    | Period (h)                     | Goodness of fit $r^2$ | Period (h)                         | Goodness of fit $r^2$ |
| 1416*              | 24.0                           | 0.487                 | 24.1                               | 0.440                 |
| 1431               | 24.0                           | 0.706                 | 24.0                               | 0.683                 |
| 1432               | 24.0                           | 0.683                 | 24.0                               | 0.706                 |
|                    | LD (D10-D20 post implantation) |                       | JetLag (D32-D46 post implantation) |                       |
|                    | Period (h)                     | Goodness of fit $r^2$ | Period (h)                         | Goodness of fit $r^2$ |
| 1429               | 24.0                           | 0.757                 | 24.5                               | 0.564                 |
| 1430               | 24.0                           | 0.522                 | 25.5                               | 0.019                 |
| 1435*              | 23.8                           | 0.739                 | 25.5                               | 0.041                 |

| Temperature |                                    |                       |
|-------------|------------------------------------|-----------------------|
|             | LD (D32-D46 post implantation)     |                       |
|             | Period (h)                         | Goodness of fit $r^2$ |
| 1416*       | 24.0                               | 0.642                 |
| 1431        | 24.1                               | 0.760                 |
| 1432        | 24.1                               | 0.741                 |
|             | JetLag (D32-D46 post implantation) |                       |
|             | Period (h)                         | Goodness of fit $r^2$ |
| 1429        | 23.6                               | 0.363                 |
| 1430        | 25.6                               | 0.062                 |
| 1435*       | 25.3                               | 0.163                 |

\* mice with high tumour burden

**Supplementary Table 1: Period of rest/activity and core body temperature patterns of LD and JL mice.** Period of locomotor activity and core body temperature pattern with respective coefficients of determination ( $R^2$ ) values defined by fitting a cosine algorithm. Mice age was 15 to 16 weeks at Day (D)10-D20 and 18 to 19 weeks at D32-D46 post microchip implantation. Source data are provided as a Source Data file.

| Mouse number | Experimental conditions (JL or LD) | Lung metastasis | number of primary tumours for HES | Grade                                                    | Score (1 to 4)   | Tumours used for injections (see Figure 4) |
|--------------|------------------------------------|-----------------|-----------------------------------|----------------------------------------------------------|------------------|--------------------------------------------|
| 1501         | LD                                 | -               | 4                                 | early carcinoma<br>early carcinoma<br>adenoma<br>adenoma | 3<br>3<br>2<br>2 |                                            |
| 1502         | LD                                 | -               | 1                                 | early carcinoma                                          | 3                |                                            |
| 1635         | JL                                 | -               | 2                                 | early carcinoma<br>early carcinoma                       | 3<br>3           |                                            |
| 1636         | JL                                 | +               | 3                                 | early carcinoma<br>early carcinoma<br>adenoma            | 3<br>3<br>2      |                                            |
| 1639         | JL                                 | -               | 1                                 | adenoma                                                  | 2                |                                            |
| 1643         | JL                                 | +               | 2                                 | late carcinoma<br>late carcinoma                         | 4<br>4           |                                            |
| 2279         | LD                                 | -               | 2                                 | hyperplasia<br>adenoma                                   | 1<br>2           | YES                                        |
| 2280         | LD                                 | -               | 2                                 | adenoma<br>adenoma                                       | 3<br>3           |                                            |
| 1129         | LD                                 | -               | 3                                 | adenoma<br>adenoma<br>adenoma                            | 2<br>2<br>2      | YES                                        |
| 2636         | LD                                 | +               | 3                                 | early carcinoma<br>late carcinoma<br>late carcinoma      | 3<br>4<br>4      | YES                                        |
| 2522         | JL                                 | -               | 2                                 | late carcinoma<br>late carcinoma                         | 4<br>4           | YES                                        |
| 1012         | LD                                 | +               | 2                                 | early carcinoma<br>late carcinoma                        | 3<br>4           | YES                                        |
| 1013         | LD                                 | -               | 2                                 | early carcinoma<br>early carcinoma                       | 3<br>3           | YES                                        |
| 1113         | JL                                 | +               | 2                                 | late carcinoma<br>late carcinoma                         | 4<br>4           | YES                                        |
| 2520         | JL                                 | -               | 2                                 | adenoma<br>early carcinoma                               | 2<br>3           | YES                                        |
| 2604         | JL                                 | -               | 1                                 | early carcinoma                                          | 3                | YES                                        |
| 2602         | JL                                 | +               | 2                                 | late carcinoma<br>late carcinoma                         | 4<br>4           | YES                                        |

**Supplementary Table 2. Grades of primary tumours from LD (blue) and JL (orange) mice.** Grades were defined according to the PyMT tumour classification by Lin and col. (2003). Scores (1 to 4) illustrate the aggressiveness of the tumours (1-2 in green being the less aggressive and 3-4 in red the most aggressive). Tumours from mice used for the tumour initiation study (Figure 4) are highlighted in yellow. 19 primary tumours from LD mice (n=8) and 17 primary tumours from JL mice (n=9) have been analysed.

|                | <b>LD</b>                      |           | <b>JL</b>                      |           | <b>p-value</b> |
|----------------|--------------------------------|-----------|--------------------------------|-----------|----------------|
|                | <b>Mean pg.ml<sup>-1</sup></b> | <b>SD</b> | <b>Mean pg.ml<sup>-1</sup></b> | <b>SD</b> |                |
| MCP-1/CCL2     | UDL                            |           | UDL                            |           |                |
| KC/CXCL1       | 146.6 (n=7)                    | 87.38     | 181.5 (n=8)                    | 129.1     | 0.5573         |
| MIP-2/CXCL2    | 5.754 (n=10)                   | 3.905     | 5.88 (n=10)                    | 7.995     | 0.9648         |
| LIX/CXCL5      | 1327 (n=10)                    | 668.1     | 1303 (n=10)                    | 659.6     | 0.9372         |
| SDF-1/CXCL12   | 255.2 (n=8)                    | 140       | 377.9 (n=6)                    | 187       | 0.2033         |
| IL-1b          | UDL                            |           | UDL                            |           |                |
| IL-2           | UDL                            |           | UDL                            |           |                |
| <b>IL-4 **</b> | 88.44 (n=10)                   | 9.23      | 71.52 (n=10)                   | 13.24     | 0.0039         |
| IL-6           | 8.112 (n=5)                    | 7.581     | 7.272 (n=6)                    | 6.295     | 0.845          |
| IL-10          | UDL                            |           | UDL                            |           |                |
| IL-12p70       | 115.9 (n=6)                    | 75.59     | 171 (n=6)                      | 160.7     | 0.4715         |
| IFN $\gamma$   | UDL                            |           |                                |           |                |
| G-CSF          | 176.7 (n=10)                   | 180.8     | 200 (n=10)                     | 168.6     | 0.7699         |
| GM-CSF         | UDL                            |           | UDL                            |           |                |
| M-CSF          | 5.679 (n=10)                   | 3.226     | 6.678 (n=10)                   | 1.657     | 0.3952         |
| TNF $\alpha$   | UDL                            |           | UDL                            |           |                |
| VEGF           | 14.77 (n=10)                   | 8.201     | 18.14 (n=10)                   | 14.09     | 0.5214         |

**Supplementary Table 3. Cytokine and chemokine quantification.** Luminex technology is used to determine circulating cytokine/chemokine concentration in the plasma of JL and LD mice . UDL: under detection level. Indicated (n) represent number of biological replicates.

| Antibodies                                      | Clone               | Source           | Cat#          |
|-------------------------------------------------|---------------------|------------------|---------------|
| PB anti-mouse CD45                              | 30-F11              | BioLegend        | 103125        |
| PB anti-mouse CD31                              | 390                 | BioLegend        | 102421        |
| PB anti-mouse TER-119                           | TER-119             | BioLegend        | 116231        |
| BV421 anti-mouse CD140A                         | APA5                | BD Biosciences   | 566293        |
| BV510 anti-mouse CD24                           | M1/69               | BioLegend        | 101831        |
| <i>BV510 Rat IgG2b, κ isotype ctrl</i>          | <i>RTK4530</i>      | BioLegend        | 400646        |
| FITC anti-mouse/rat CD29                        | HMβ1-1              | BioLegend        | 102205        |
| <i>FITC Armenian Hamster IgG isotype ctrl</i>   | <i>HTK888</i>       | BioLegend        | 400905        |
| PE anti-human/ouse CD49f                        | GoH3                | BioLegend        | 313611        |
| <i>PE Rat IgG2a, κ Isotype ctrl</i>             | <i>RTK2758</i>      | BioLegend        | 400507        |
| PE/Cy7 anti-mouse/human CD44                    | IM7                 | BioLegend        | 103029        |
| <i>PE/Cy7 Rat IgG2b, κ isotype ctrl</i>         | <i>RTK4530</i>      | BioLegend        | 400617        |
| APC anti-mouse CD90.1 (Thy-1.1)                 | OX-7                | BioLegend        | 202526        |
| <i>APC Mouse IgG1,κ isotype Ctrl</i>            | <i>MOPC-21</i>      | BioLegend        | 400119        |
| APC-Vio770 anti-mouse CD326 (EpCAM)             | caa7-9G8            | Miltenyi Biotec  | 130-102-137   |
| <i>APC-Vio770 Rat IgG1,κ isotype ctrl</i>       | <i>ES26-14D1.11</i> | Miltenyi Biotec  | 130-103-036   |
| AF750 anti-mouse CXCR1/CD181                    | 1122A               | R&D Biotechne    | FAB8628S      |
| <i>AF750 Rabbit IgG control</i>                 | <i>60024B</i>       | R&D Biotechne    | IC1051S       |
| PE-Vio770 anti-mouse CXCR2/CD182                | REA942              | Miltenyi Biotec  | 130-115-636   |
| <i>PE-Vio770 REA Control</i>                    | <i>REA293</i>       | Miltenyi Biotec  | 130-113-452   |
| APC anti-mouse CXCR4/CD184                      | REA107              | Miltenyi Biotec  | 130-102-245   |
| <i>APC REA Control</i>                          | <i>REA293</i>       | Miltenyi Biotec  | 130-113-446   |
| FITC anti-mouse/human CD11b                     | M1/70               | BioLegend        | 101205        |
| <i>FITC Rat IgG2b, κ isotype ctrl</i>           | <i>RTK4530</i>      | BioLegend        | 400605        |
| PE anti-mouse CD64 (FcγRI)                      | X54-5/7.1           | BioLegend        | 139303        |
| <i>PE Mouse IgG1, κ isotype ctrl</i>            | <i>MOPC-21</i>      | BioLegend        | 400111        |
| PE/Cy7 anti-mouse CD11c                         | N418                | BioLegend        | 117317        |
| <i>PE/Cy7 Armenian Hamster IgG isotype ctrl</i> | <i>HTK888</i>       | BioLegend        | 400921        |
| APC anti-mouse I-A/I-E (MHCII)                  | M5/114.15.2         | BioLegend        | 107613        |
| <i>APC Rat IgG2b, κ isotype ctrl</i>            | <i>RTK4530</i>      | BioLegend        | 400611        |
| APC-Vio770 anti-mouse Ly-6G                     | REA526              | Miltenyi Biotec  | 130-107-916   |
| <i>APC-Vio770 REA Control</i>                   | <i>REA293</i>       | Miltenyi Biotec  | 130-104-634   |
| PE/Dazzle 594 anti-mouse CD45                   | 30-F11              | BioLegend        | 103145        |
| BV510 anti-mouse CD3                            | 17A2                | BioLegend        | 100233        |
| APC/Fire750 anti-mouse CD8a                     | 53-6.7              | BioLegend        | 100765        |
| <i>APC/Fire750 Rat IgG2a, κ isotype ctrl</i>    | <i>RTK2758</i>      | BioLegend        | 400567        |
| AF488 anti-mouse CD4                            | GK1.5               | BioLegend        | 100423        |
|                                                 |                     |                  |               |
| <b>True-Nuclear Mouse Treg Flow Kit</b>         |                     | <b>BioLegend</b> | <b>320029</b> |
| APC/PE anti-mouse CD4/CD25                      |                     | BioLegend        | 78929         |
| AF488 anti-mouse/rat/human FOXP3                | 150D                | BioLegend        | 79176         |
| <i>AF488 Mouse IgG1,κ isotype ctrl</i>          | <i>MOPC-21</i>      | BioLegend        | 79477         |
|                                                 |                     |                  |               |
| AF488 anti-PyMT                                 |                     | Santa Cruz       | sc-53481      |

**Supplementary Table 4. List of antibodies used for flow cytometry.**

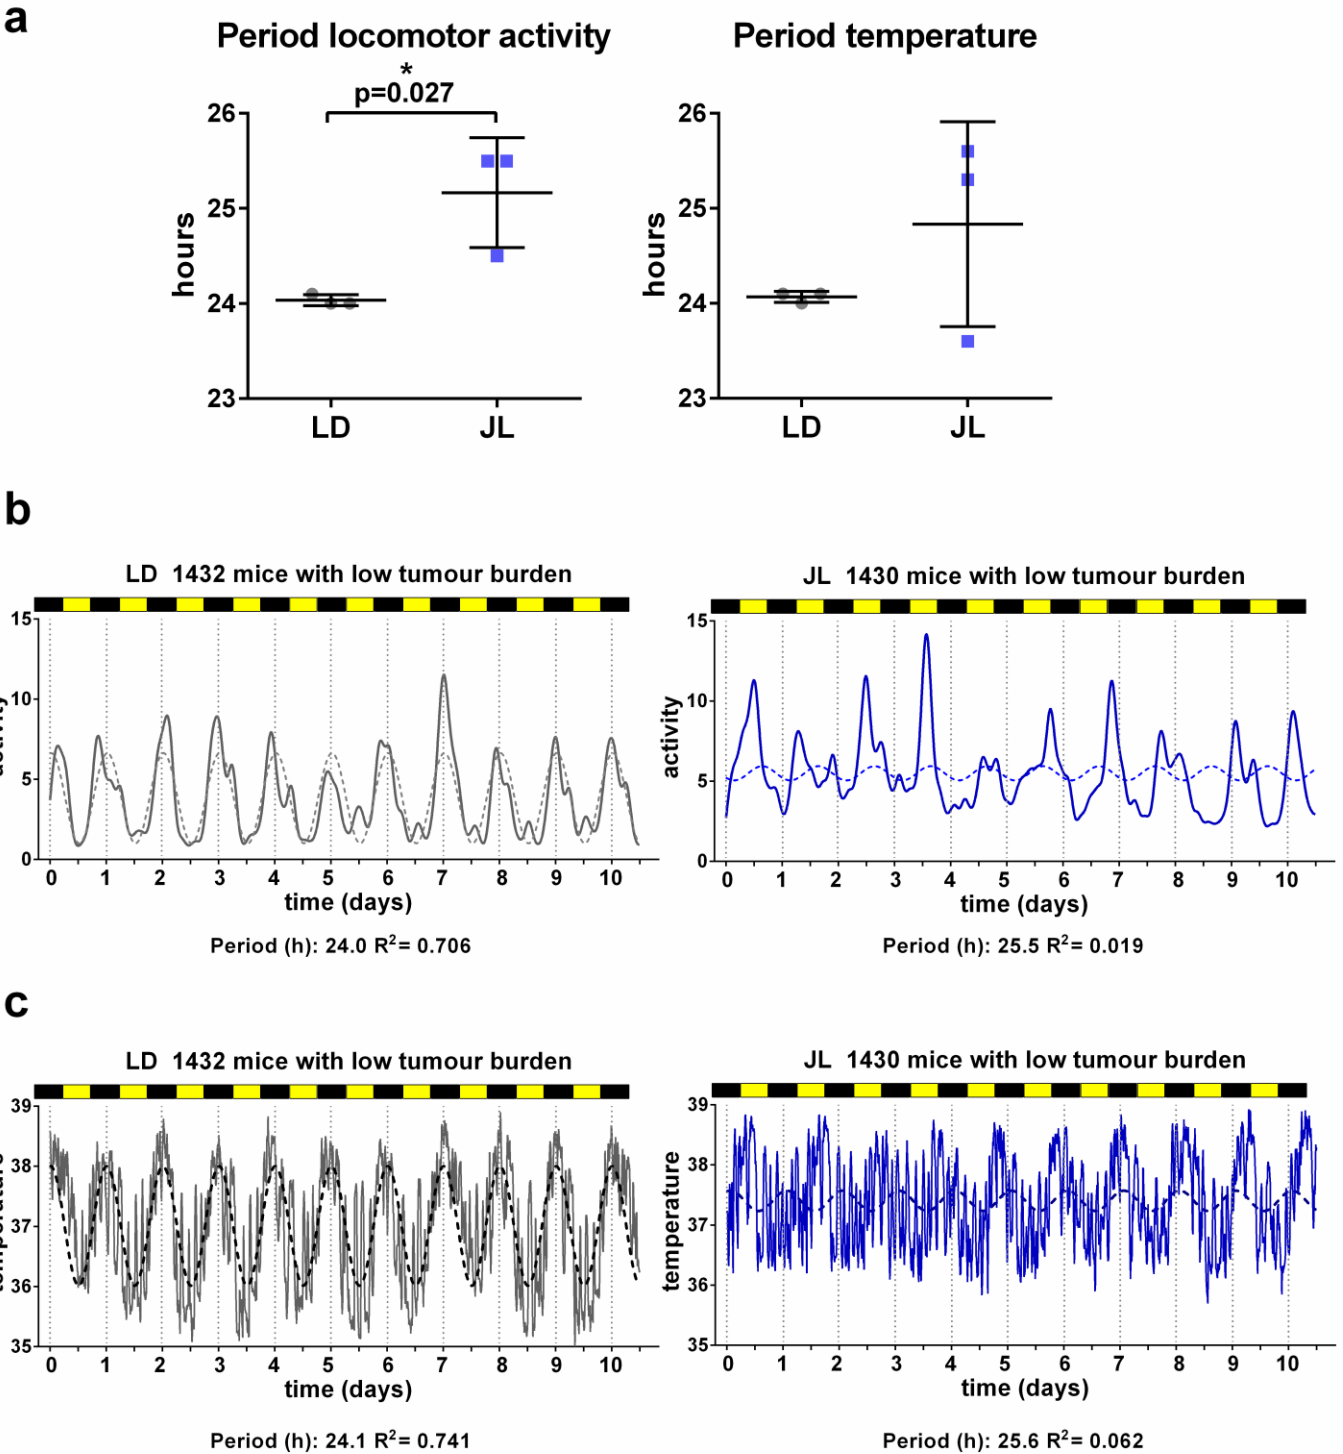

**Supplementary Figure 1. Telemetry analysis.** (a) Comparison of locomotor activity and temperature rhythmicity between LD (gray) (n=3) and JL (blue) (n=3) mice at age of 18 to 19 weeks. Data are presented as scatter dot plots, with lines representing the median with interquartile range (error bars). p-value calculated from an unpaired two-sided t-test. (b) Observed (solid line) vs modelled (dotted line) locomotor activity rhythmicity in LD vs JL mice with matched tumour burden (c) Observed (solid line) vs modelled (dotted line) temperature rhythmicity in LD vs JL mice with matched tumour burden. The dotted lines represent the modelled curves derived from the telemetry data using cosine algorithm. Respective period (h) and the coefficient of determination ( $R^2$ ) presented for each activity and temperature patterns. Source data are provided as a Source Data file. Indicated (n) represent number of biological replicates.

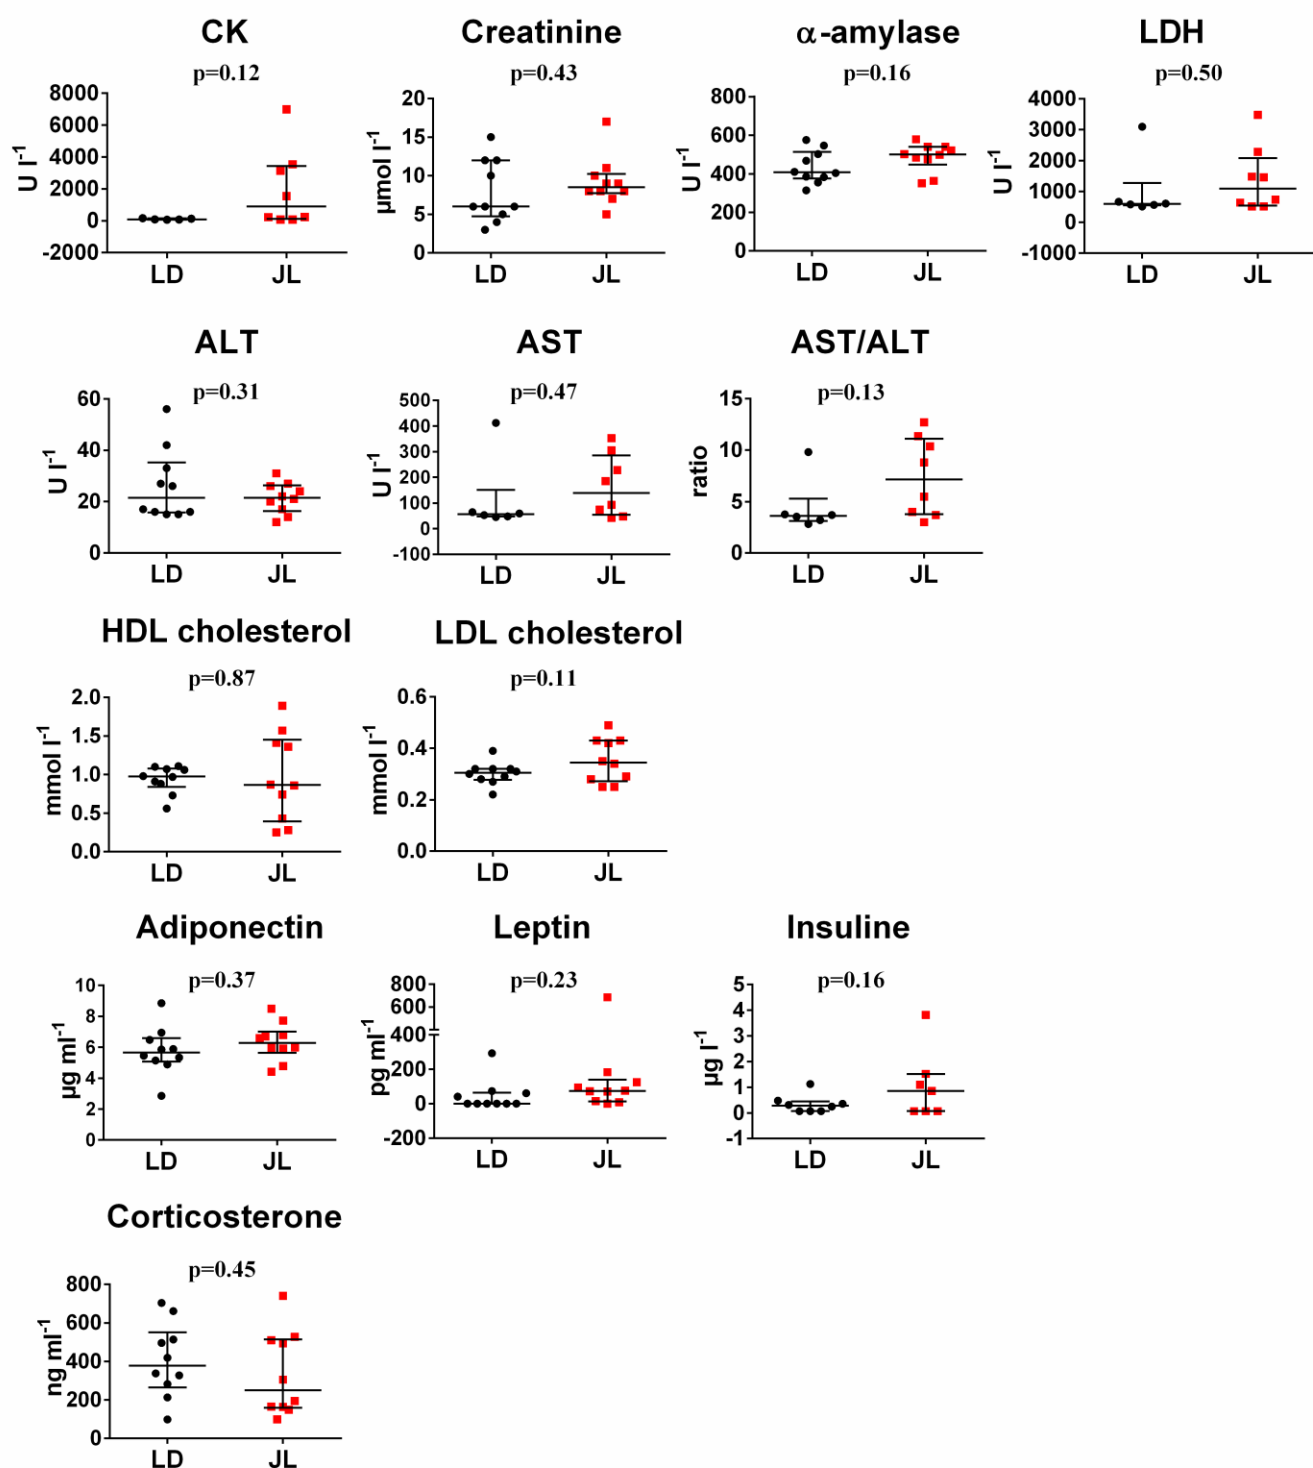

**Supplementary Figure 2. Blood biochemistry and hormone levels.** Quantification of creatine kinase (CK)(n=5;8), creatinine,  $\alpha$ -amylase, lactate dehydrogenase (LDH)(n=6;8), alanine aminotransferase (ALT), aspartate aminotransferase (AST)(n=6;8), AST/ALT ratio(n=6;8), high density lipoprotein (HDL) cholesterol, low density lipoprotein (LDL) cholesterol, adiponectin, leptin(n=4;9), insulin(n=8;7), and corticosterone in LD and JL mice (n=10;10 respectively if it is not stated otherwise). Data are presented as scatter dot plots, with lines representing the median with interquartile range (error bars). p-value calculated from an unpaired two-sided t-test. Indicated (n) represent number of biological replicates. Source data are provided as a Source Data file.

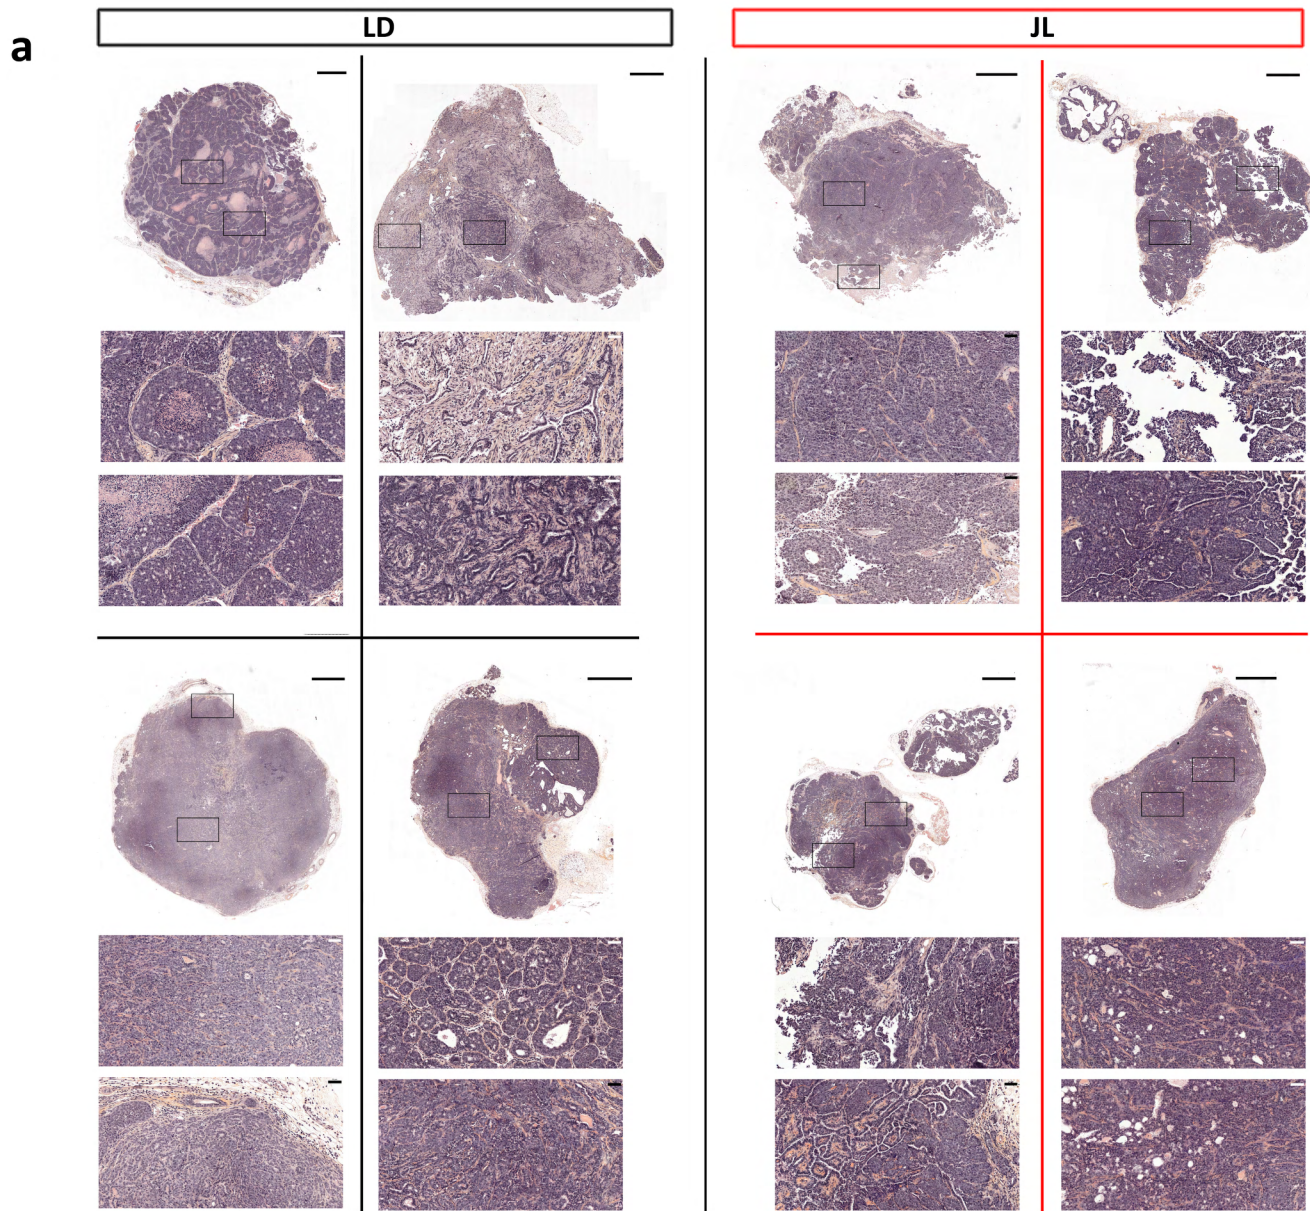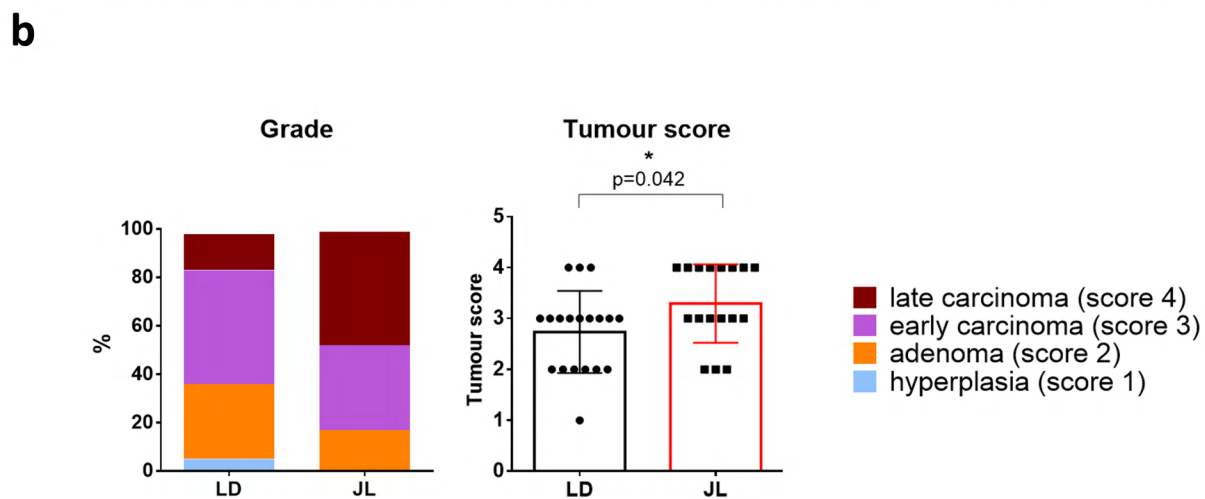

**Supplementary Figure 3. Histological analysis of primary tumours.** (a) A global view of eight primary tumours from LD (n=4) and JL (n=4) mice is shown, each scale bar represents 1mm. For each tumour, black squares indicate the localization of two higher magnifications for which each scale bar represents 50µm (b) Sections of primary tumours (n=19 for LD and n=17 for JL) were analysed and graded according to Lin and col. (2003), in a four-stage classification scheme that includes hyperplasia (score 1, blue), adenoma/mammary intraepithelial neoplasia (MIN) (score 2, orange), and early (score 3, violet) and late carcinoma (score 4, dark red) (see supplementary Table 2). Grade and score data presented as bar graph and scattered dot plot with bars and lines representing the mean and SD (error bars). p-value calculated from an unpaired two-sided t-test. Indicated (n) represent number of biological replicates.

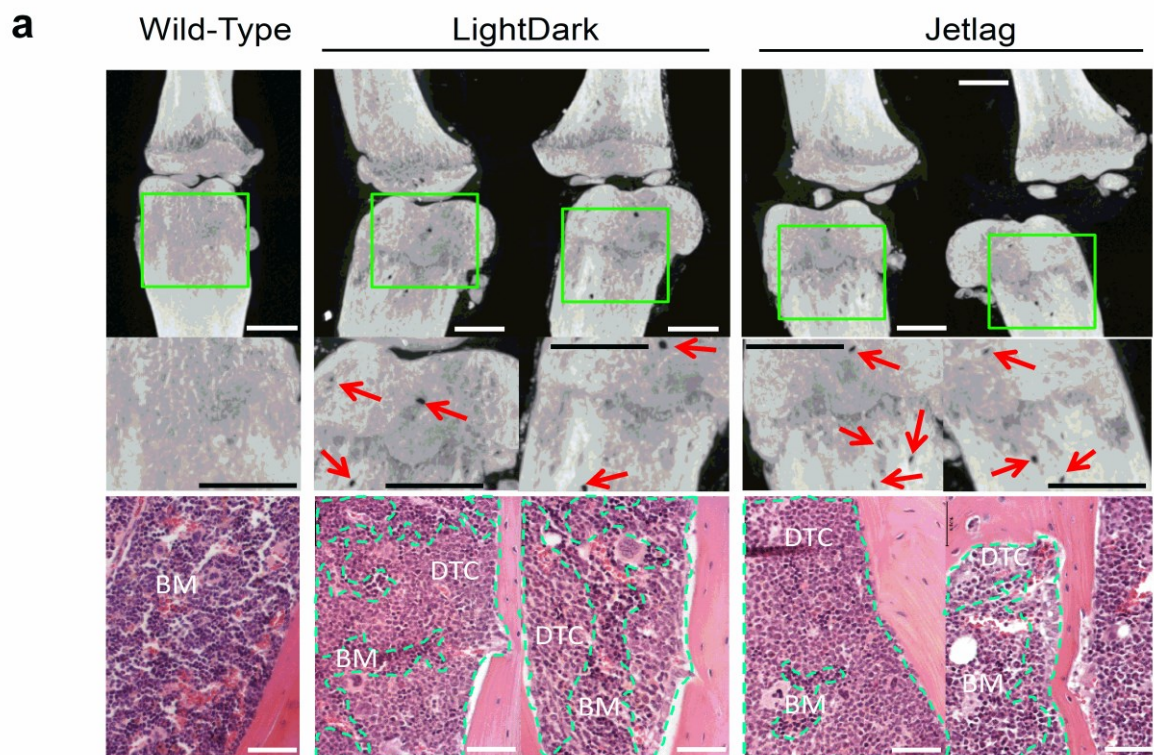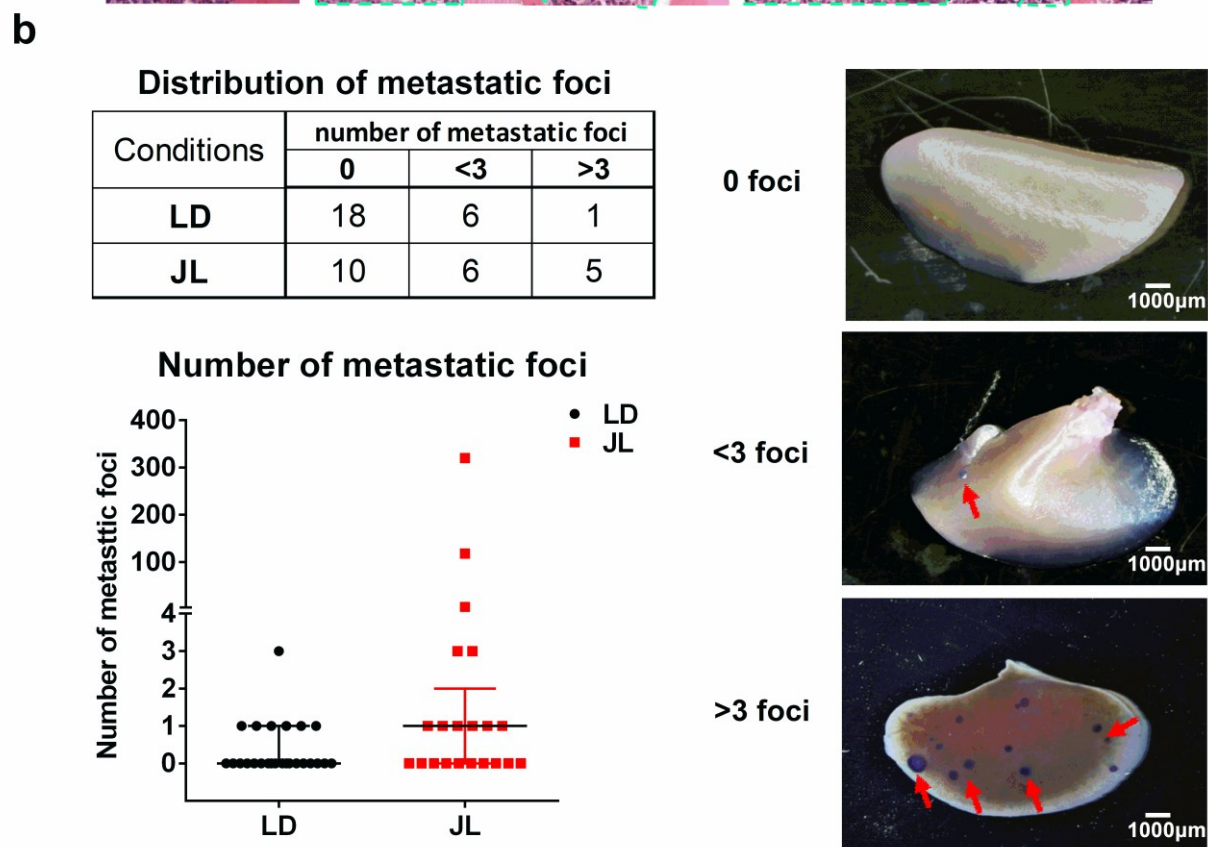

**Supplementary Figure 4. Cancer cell dissemination in bones and lungs.** (a) Cancer cell dissemination in bones. (Upper panel)  $\mu$ CT 3D reconstruction (with CTVox program). Lower images are magnifications of the green box. Each red arrow indicates abnormal tissue that could be osteolytic lesions. Each scale bar represents 1 mm. (Lower panel) H&E images representing areas, delimited by green dotted lines, containing abnormal cells that could be tumoural cells. BM: bone marrow, DTC: disseminated tumour cells. Scale represent 100 $\mu$ m (b) Quantification of lung metastasis. Lung metastases were detected using immunocytochemistry and revealed by NBT/BCIP staining (blue labelling, red arrows). Lung metastases were counted and lungs were classified in three categories: no metastatic foci, from 1-3 metastatic foci, and more than 3 metastatic foci. Data are presented as scatter dot plots, with lines representing the median with interquartile range (error bars).

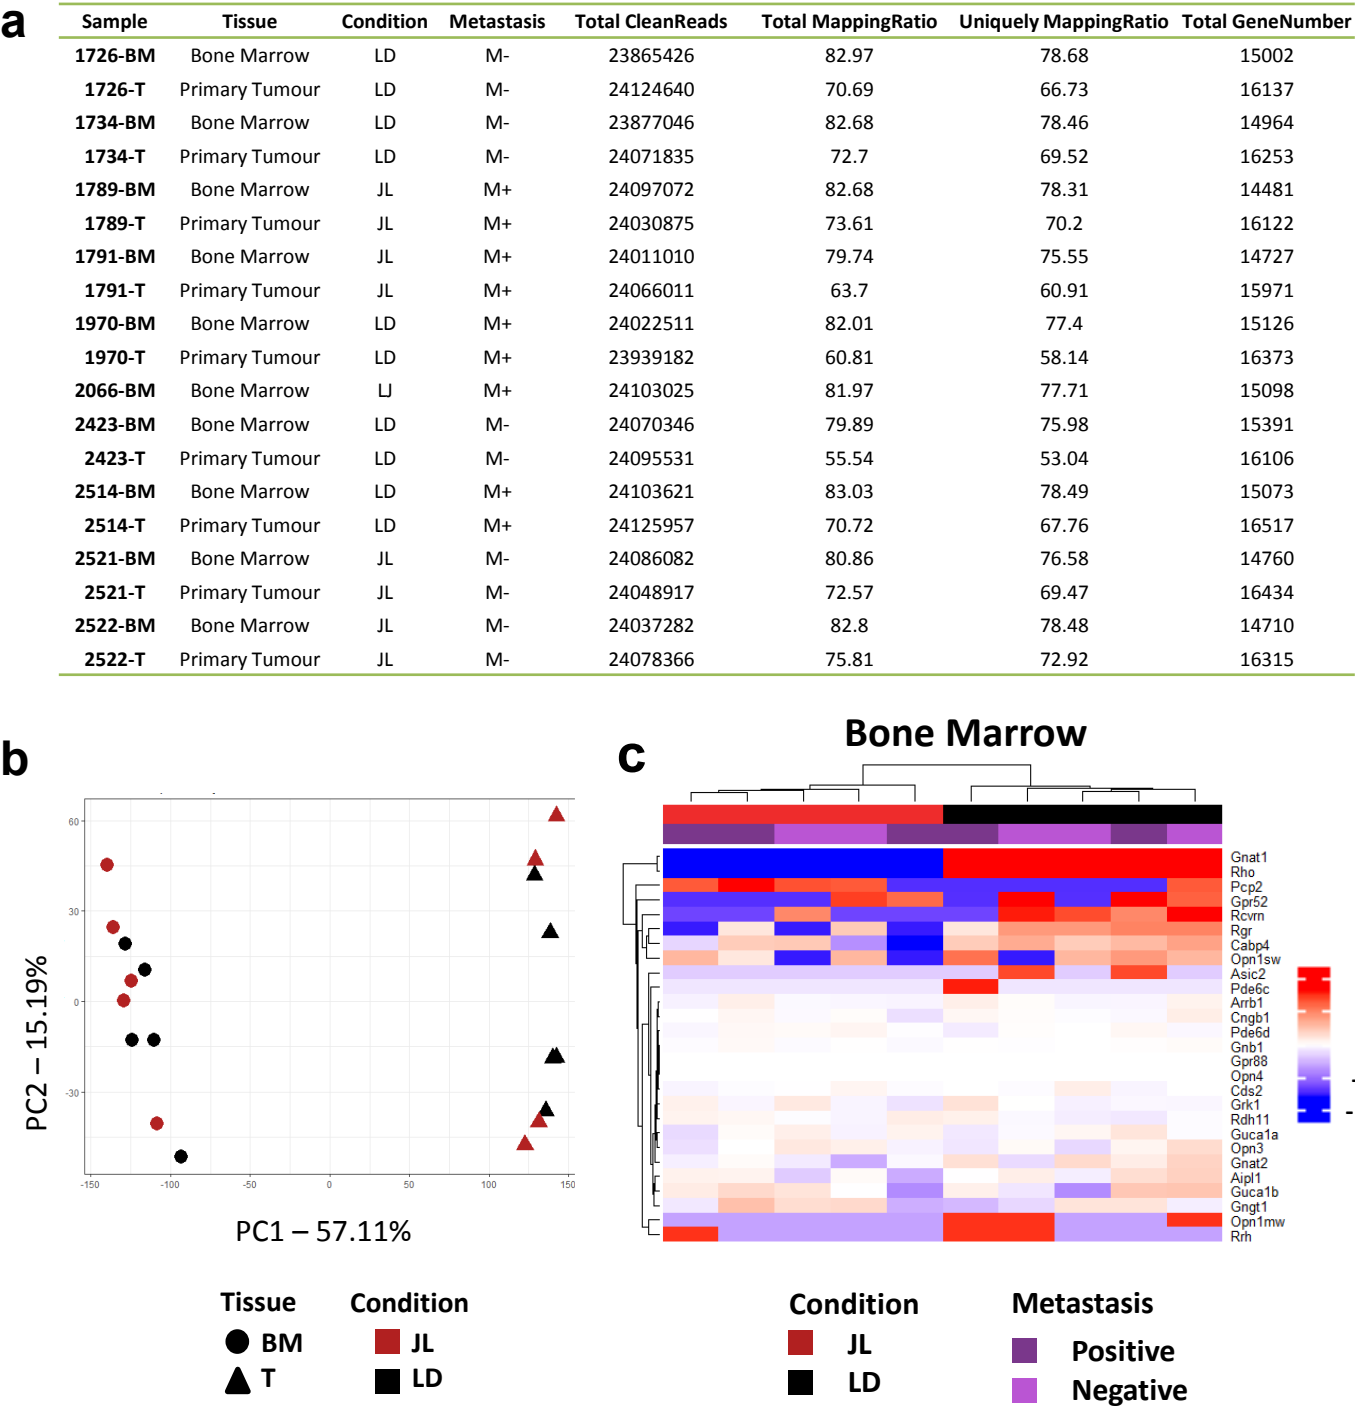

**Supplementary Figure 5. Transcriptome analysis of bone marrow mono-nucleated cells and primary tumours.** (a) Global statistics for read numbers and mapping of mRNA-seq data. (b) Principal Components Analysis of all samples based on the expression values of shared genes (12556 genes). JL samples (n=9) are in red and LD (n=10) in black. Bone marrow (BM) samples are represented by circles and primary tumours (T) by triangles. (c) Heatmap based on the expression of all expressed genes associated with the GO term Phototransduction (GO:0007602) in mono-nucleated cells from bone marrow. Samples appear as columns and genes as rows; samples are labelled by the experimental conditions (JL (n=5) in red and LD (n=5) in black) and the presence (dark violet)/absence (light violet) of metastasis. The colour scale represents different expression levels, red for high expression, and blue for low expression. Hierarchical clustering was performed using Euclidean distance and the Ward.D2 criterion for agglomeration. Indicated (n) represent number of biological replicates.

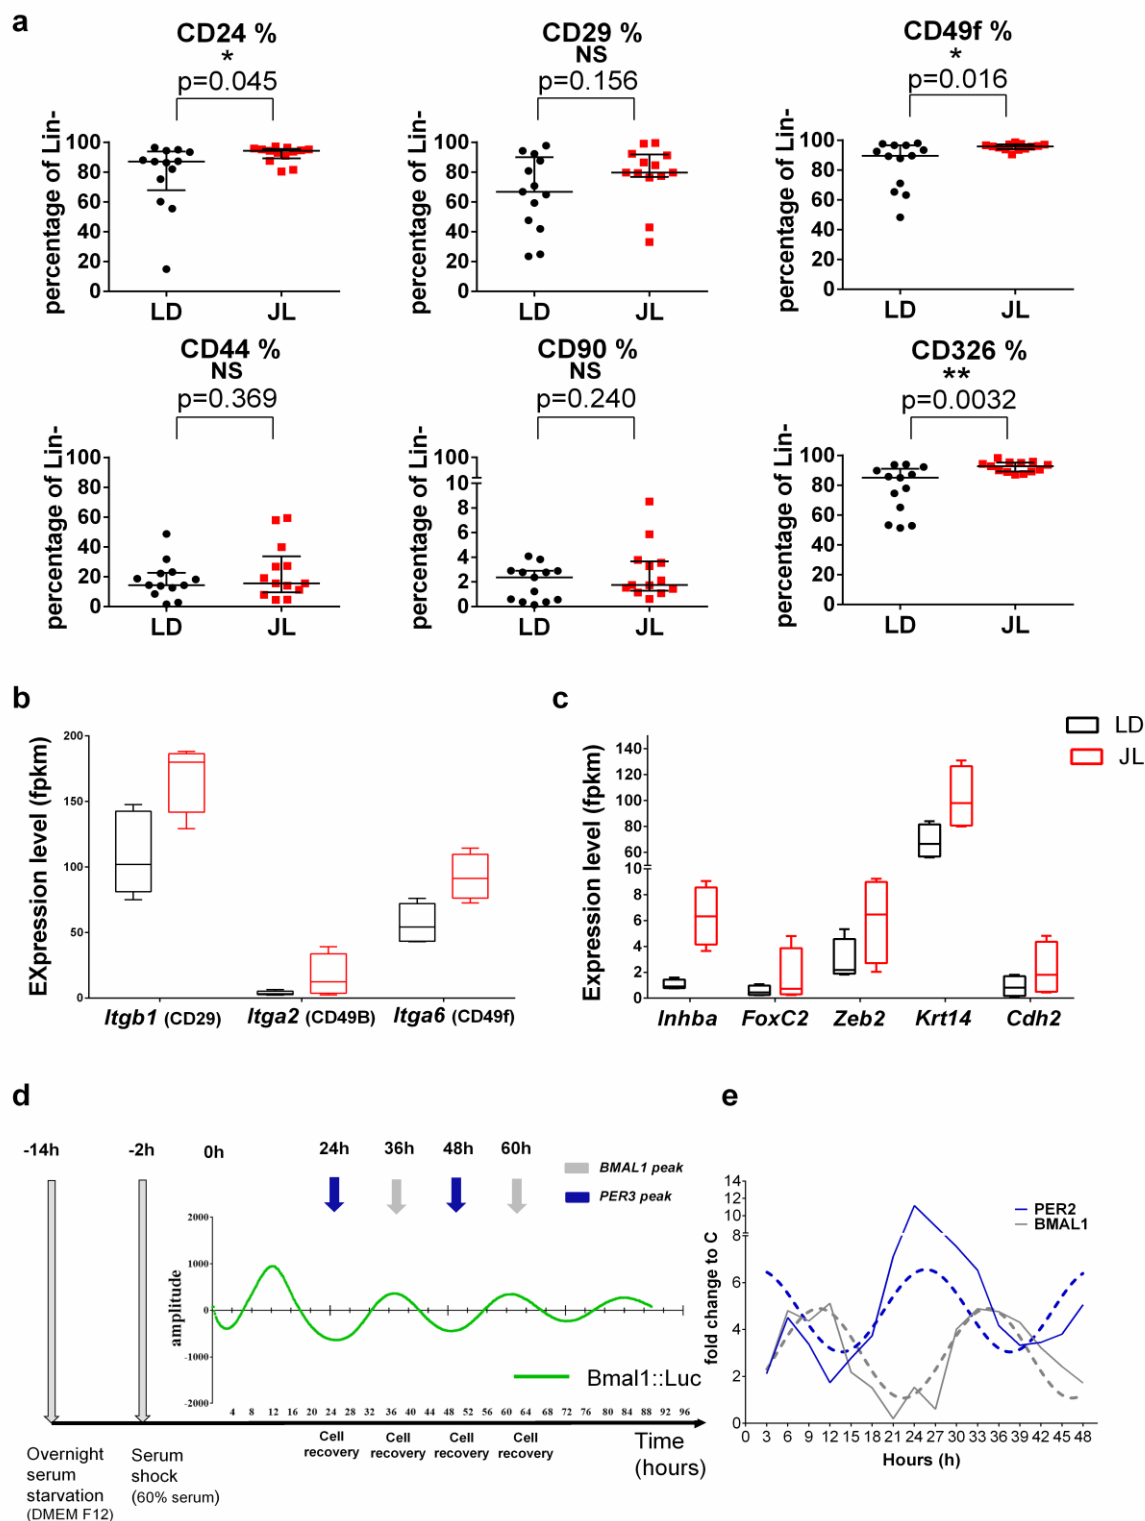

**Supplementary Figure 6. Expression of stemness and EMT markers in mammary tumours cell.** (a) Relative distribution of stemness markers CD24, CD29, CD49f, CD44, CD90, and CD326 in LD (n=13) and JL (n=13) Lin<sup>-</sup> (CD45<sup>-</sup>CD31<sup>-</sup>CD140a<sup>-</sup>Ter119<sup>-</sup>) tumour cells, as determined by flow cytometry. Data are shown as scatter dot plots with lines representing the median with interquartile range (error bars). p-values obtained from an unpaired two-sided t-test. (b) Gene expression values (FPKM) of *Itgb1*, *Itga2*, and *Itga6* and (c) EMT-associated genes in primary tumours from LD (black boxes, n=5) and JL (red boxes, n=4) mice. Data are presented as box-and-whisker plots. Variability is depicted using medians (line in the box), 25th and 75th percentiles (box), and min to max (whiskers). Respective log2FoldChange (log2FC) and p-values are listed in Supplementary Data 3. (d) Synchronisation protocol used on human mammary epithelial cells to study stemness at different circadian phases. *BMAL1* oscillations are represented by the green line, using a *BMAL1*:LUC reporter cell line. (e) Oscillatory expression profile of *PER2* and *BMAL1* in synchronised MCF12A cells. Indicated (n) represent number of biological replicates. Source data are provided as a Source Data file.

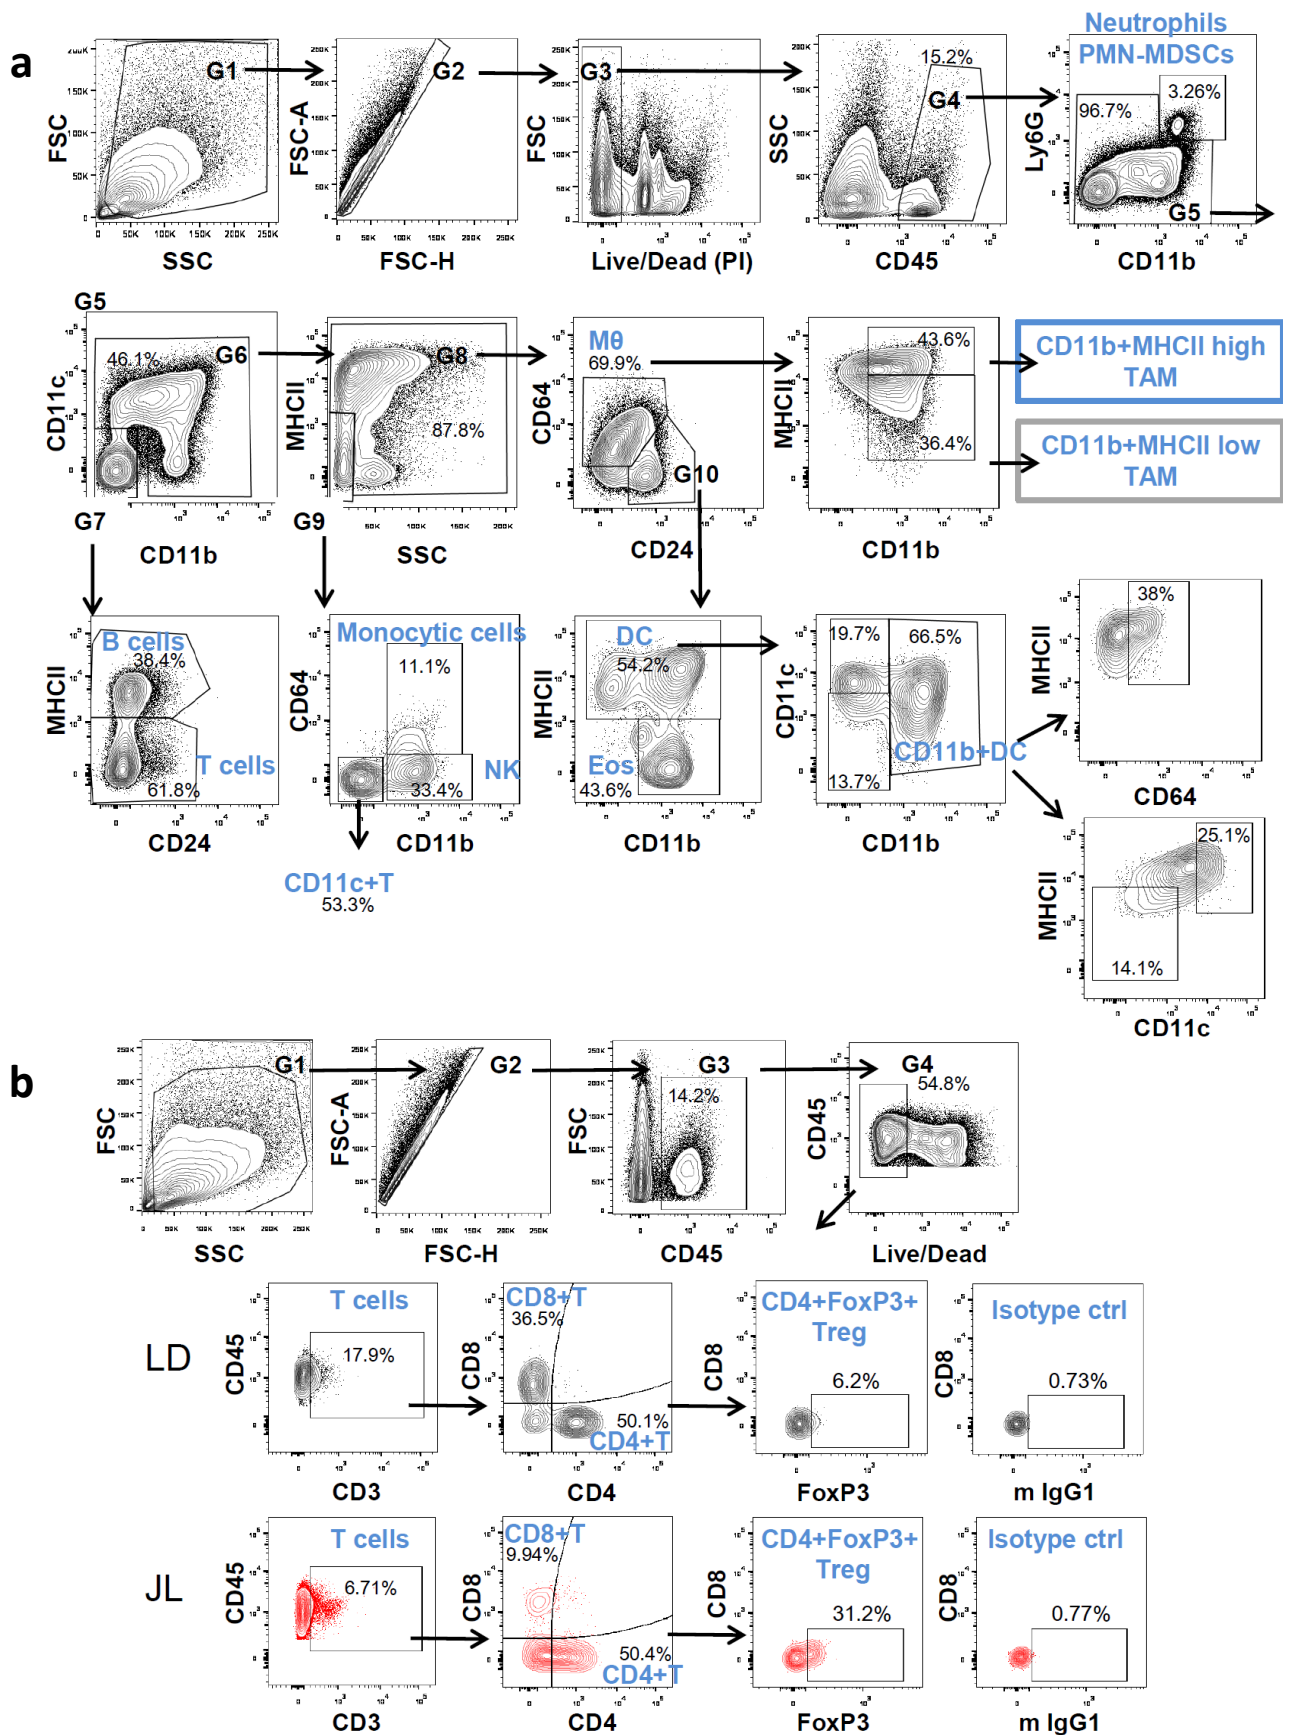

**a**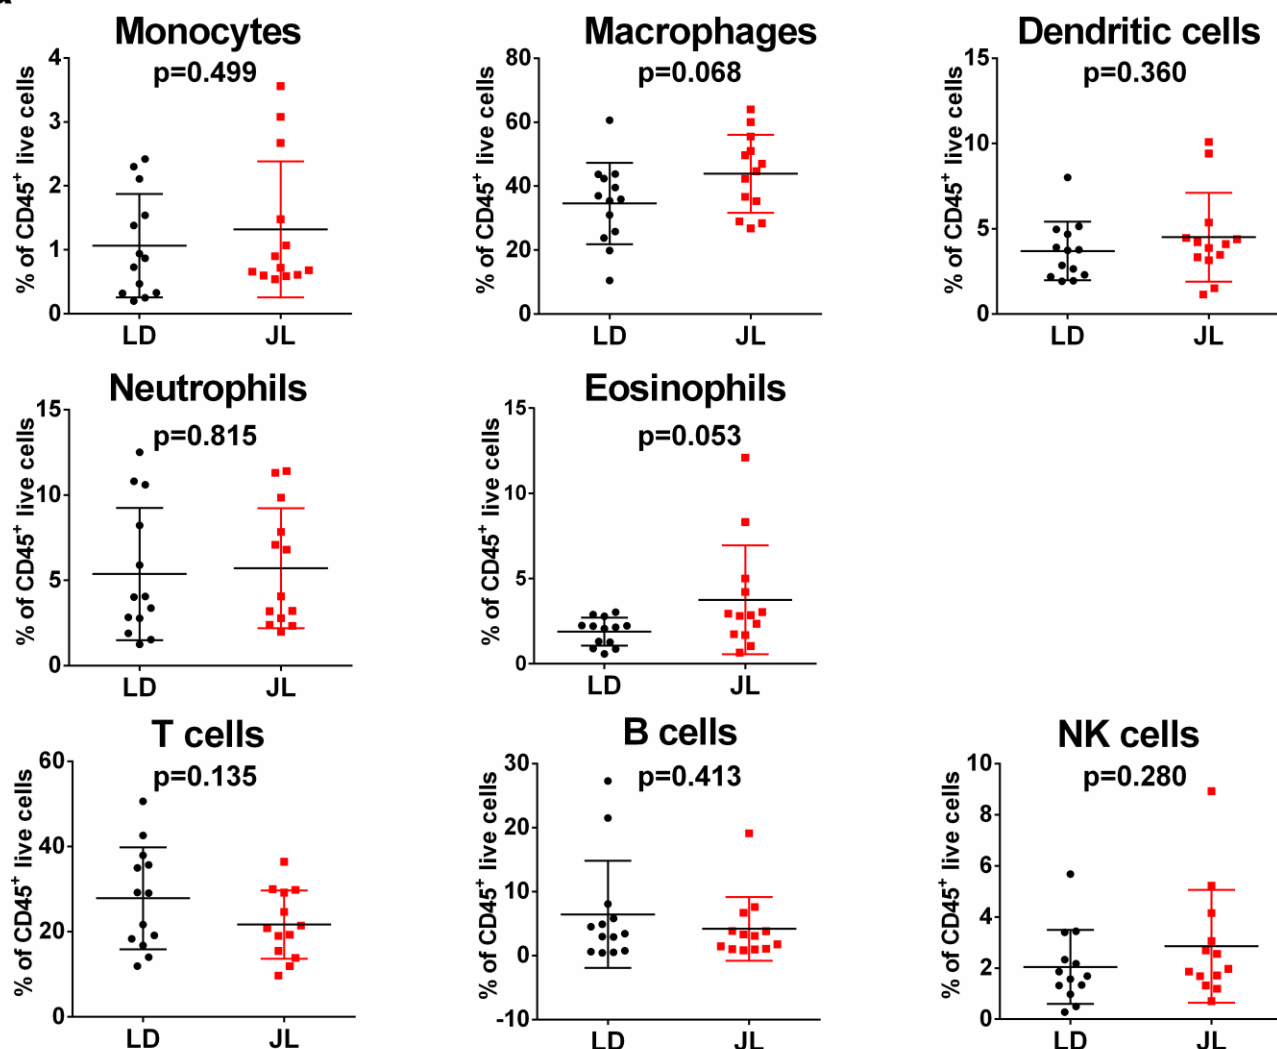**b**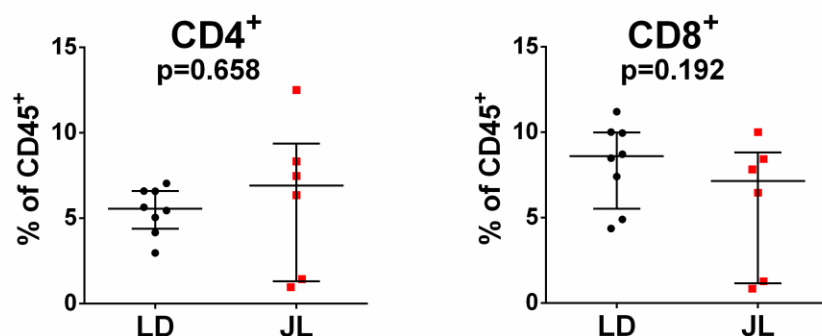

**Supplementary Figure 8. Main immune cell types in tumours and peripheral blood.** (a) Main immune cell types in primary tumours. Proportions of monocytes, macrophages, dendritic cells, neutrophils, eosinophils, T-cells, B-cells, and NK-cells were quantified from LD (n=13) and JL (n=13) mice. Data are presented as scatter dot plots with lines representing the median and interquartile range (error bars). p-value calculated from an unpaired two-sided t-test. (b) Peripheral blood CD4<sup>+</sup> and CD8<sup>+</sup> T cells in LD (n=8) and JL (n=6) mice. Data are presented as scatter dot plots with lines representing the median with interquartile range (error bars). p-value calculated from an unpaired two-sided t-test. Indicated (n) represent number of biological replicates. Source data are provided as a Source Data file.

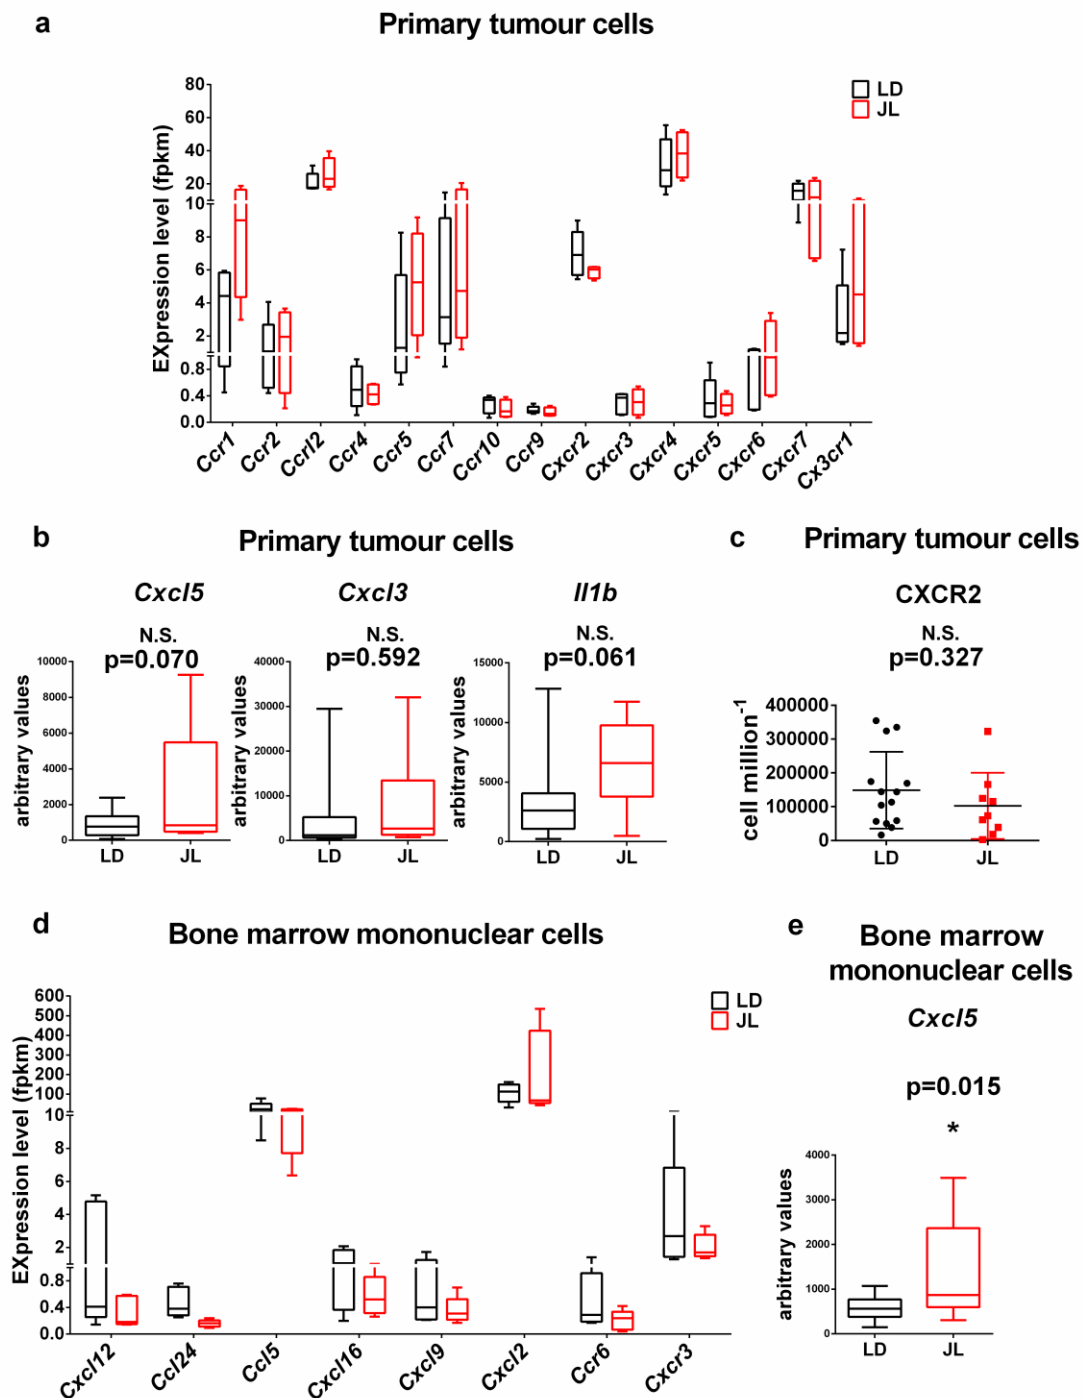

**Supplementary Figure 9. Expression of chemokines/cytokines and their receptors.** (a) Gene expression values (FPKM) of chemokine/cytokine receptors in primary tumours from LD (n=5) and JL (n=4) mice. Data are presented as box-and-whisker plots. Respective log2FoldChange and p-values are listed in Supplementary Data 3. (b) Expression values of *Cxcl5*, *Cxcl3*, and *Il1b* quantified by real-time PCR in primary tumour cells from LD (n=13) and JL (n=11) mice. Data are presented as box-and-whisker plots. p-value calculated from an unpaired two-side t-test. (c) Flow cytometry analysis of CXCR2 expression in cancer cells from primary tumours of LD (n=14) and JL (n=9) mice. Data are presented as scatter dot plots with lines representing the median with interquartile range (error bars). p-value calculated from an unpaired two-side t-test. (d) Gene expression values (FPKM) of the most up- or downregulated cytokines/chemokines and their receptors in bone marrow from LD (n=5) and JL (n=4) mice. Data are presented as box-and-whisker plots. Respective log2FoldChange and p-values are listed in Supplementary Data 3. (e) Expression values of *Cxcl5* quantified by real-time PCR in bone marrow cells from LD (n=13) and JL (n=11) mice. Data are presented as box-and-whisker plots. p-value calculated from an unpaired two-sided t-test. For all box-and-whisker plots, variability is depicted using medians (line in the box), 25th and 75th percentiles (box), and min to max (whiskers). Source data are provided as a Source Data file.

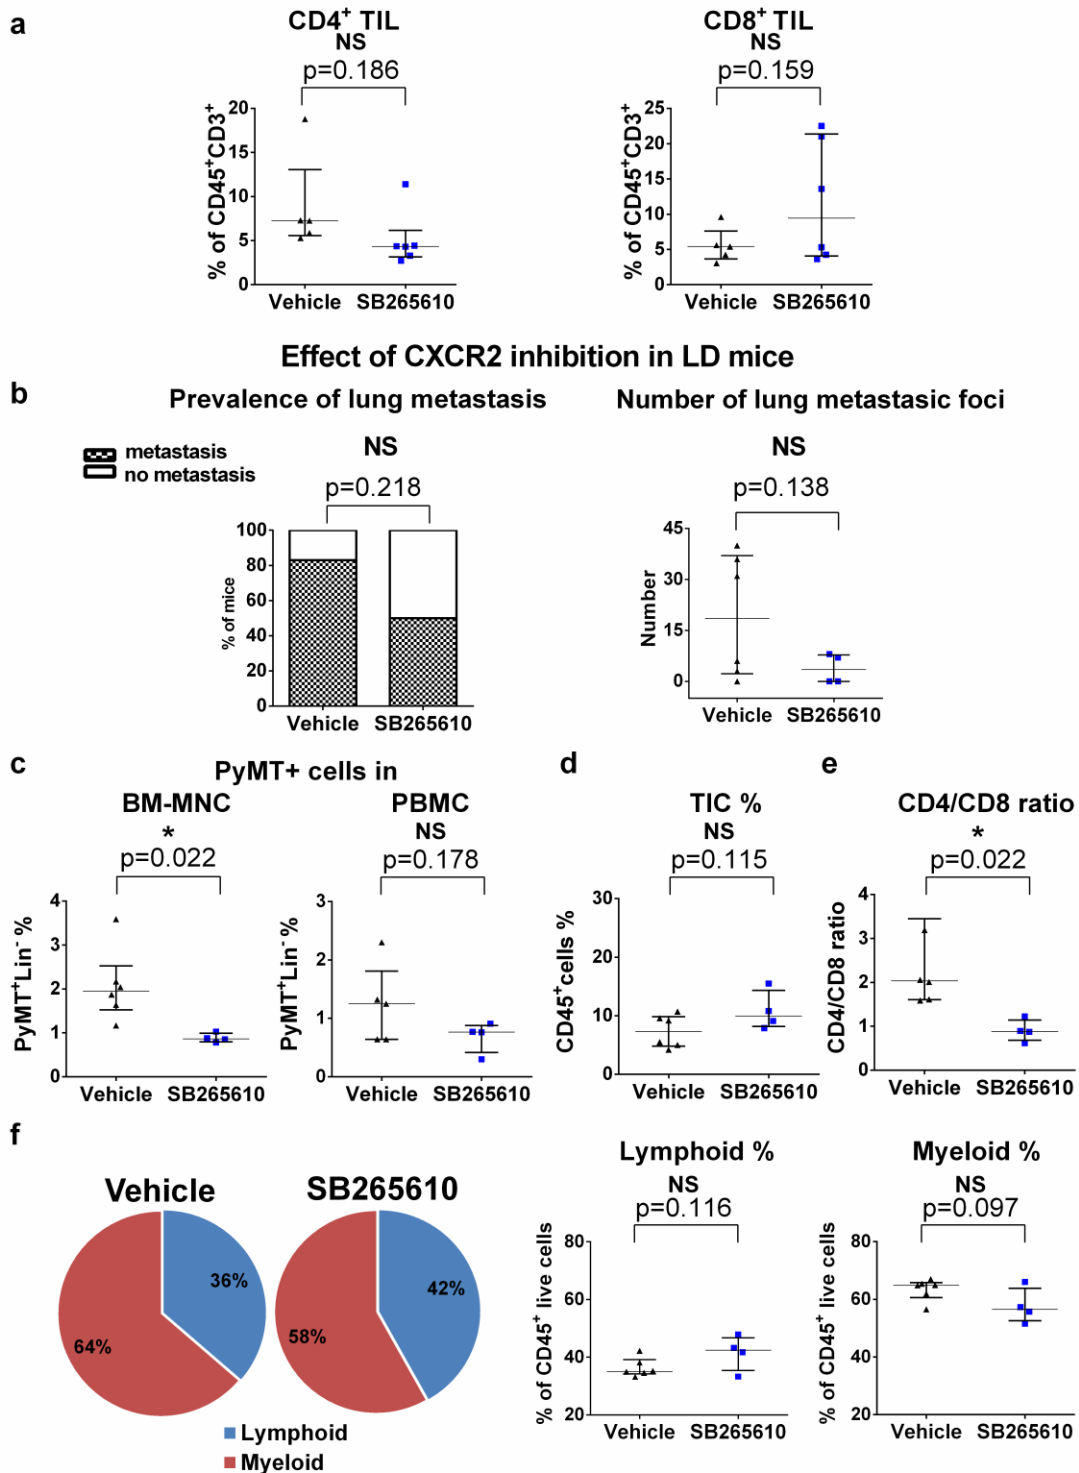

**Supplementary Figure 10. Effects of CXCR2 inhibition on tumour development in JL and LD mice.** (a) Tumour-infiltrating lymphocytes (TIL) in vehicle (n=5) or CXCR2 inhibitor treated (n=6) JL mice. Data are presented as scatter dot plots with lines representing the median with interquartile range (error bars). p-value calculated from an unpaired two-sided t-test. (b-f) Effects of CXCR2 inhibition in LD mice: (b) Prevalence of lung metastasis and the number of lung metastatic foci in mice injected with vehicle (n=6) or SB265610 (n=4). Data presented as bar plot and scatter dot plot with lines representing median with interquartile range (error bars), p-value obtained from binomial two-sided test and unpaired two-sided t-test. (c) Percentage of disseminated tumour cells in BM-MNC in vehicle (n=6) and SB265610 (n=4) group and in blood (n=5, 4) respectively. (d) Percentage of tumour infiltrating immune cells (TIC) in vehicle (n=6) and SB265610 (n=4) cohort. (e) CD4/CD8 ratio in tumours from vehicle (n=6) and SB265610 (n=4) groups. Data are presented as scatter dot plot with lines representing median with interquartile range (error bars). p-values are calculated from an unpaired two-sided t-test. (f) Relative distribution of lymphoid and myeloid compartment of TIC in both cohorts. Data presented as pie charts displaying the mean values of mice and as scatter dot plot with lines representing median with interquartile range (error bars). p-values are calculated from an unpaired two-sided t-test. Indicated (n) represent number of biological replicates. Source data are provided as a Source Data file.

## References

1. Yu, Y.-R. A. *et al.* A Protocol for the Comprehensive Flow Cytometric Analysis of Immune Cells in Normal and Inflamed Murine Non-Lymphoid Tissues. *PLOS ONE* **11**, e0150606 (2016).
